# Supplementary material for: Self-assembled nanoparticles based on supramolecular-organic frameworks and temoporfin for an enhanced photodynamic therapy in vitro and in vivo
Source: Royal Society of Chemistry journal article supplement (doi:10.1039/d1tb02601a), 2022-01-01
Supplement: d1tb02601a1.pdf [file d1tb02601a1.pdf]

## Supporting Information

Self-assembly nanoparticles based on supramolecular-organic  
frameworks and temoporfin for an enhanced photodynamic  
therapy *in vitro* and *in vivo*

Zi-Yue Xu,<sup>‡,1</sup> Weipeng Mao,<sup>‡,1</sup> Zizhen Zhao,<sup>1</sup> Ze-Kun Wang,<sup>1</sup> Yue-Yang Liu,<sup>1</sup> Yan  
Wu,<sup>1</sup> Hui Wang,<sup>1</sup> Dan-Wei Zhang,<sup>1</sup> Zhan-Ting Li<sup>\*,1</sup> Da Ma<sup>\*,1,2</sup>

<sup>1</sup>Department of Chemistry, Fudan University, 220 Handan Road, Shanghai 200433,  
China.

<sup>2</sup>School of Pharmaceutical and Materials Engineering & Institute of Advanced  
Studies, Taizhou University, 1139 Shifu Avenue, Jiaojiang 318000, Zhejiang, China

Email: ztli@fudan.edu.cn, dama@fudan.edu.cn

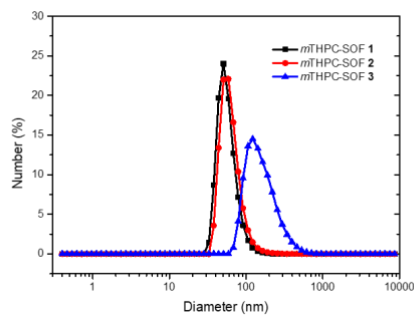

**Figure S1.** DLS profile of *m*THPC-SOF 1-3 ( $[m\text{THPC}] = [\text{T4-6}] = 0.1 \text{ mM}$ ) in water at 25 °C. The solutions were left to stand for 24 hours before being measured.

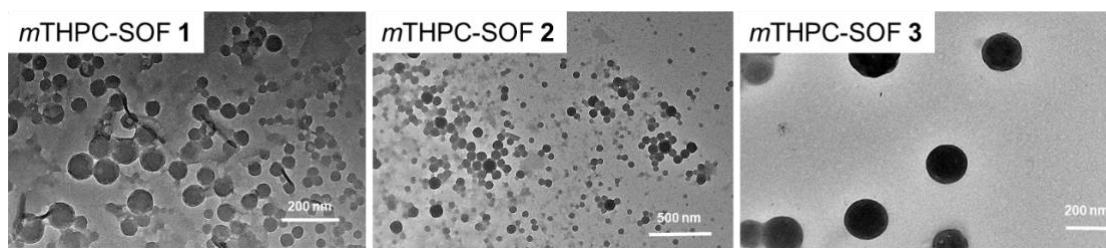

**Figure S2.** TEM images of *m*THPC-SOF 1-3 ( $[\text{T4-6}]:[m\text{THPC}] = 1:1$ ).

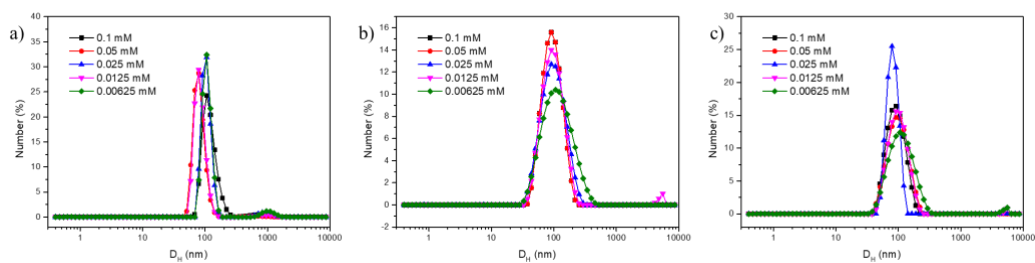

**Figure S3.** DLS profile of (a) *m*THPC-SOF 1 ( $[m\text{THPC}]:[\text{T4}] = 1:5$ ) (b) *m*THPC-SOF 2 ( $[m\text{THPC}]:[\text{T5}] = 1:5$ ) and (c) *m*THPC-SOF 3 ( $[m\text{THPC}]:[\text{T6}] = 1:5$ ) in water with different concentration at 25 °C. The solutions were left to stand for 24 hours before being measured.

**Table S1.**  $\zeta$  of *m*THPC-SOF 1-3 ([T4-6] = 0.1, 0.05, 0.025, 0.0125, 0.00625 mM, [*m*THPC]:[T4-6] = 1:2) aqueous solutions were tested.

|            | <i>m</i> THPC-SOF 1 | <i>m</i> THPC-SOF 2 | <i>m</i> THPC-SOF 3 |
|------------|---------------------|---------------------|---------------------|
| 0.1 mM     | 31.5±0.9            | 33.8±3.0            | 32.5±0.2            |
| 0.05 mM    | 28.8±2.3            | 23.1±0.3            | 32.2±0.1            |
| 0.025 mM   | 14.3±1.1            | 13.7±1.2            | 19.3±2.1            |
| 0.0125 mM  | 17.1±0.2            | 16.2±1.5            | 23.4±2.2            |
| 0.00625 mM | 15.5±0.8            | 14.7±1.3            | 23.4±1.7            |

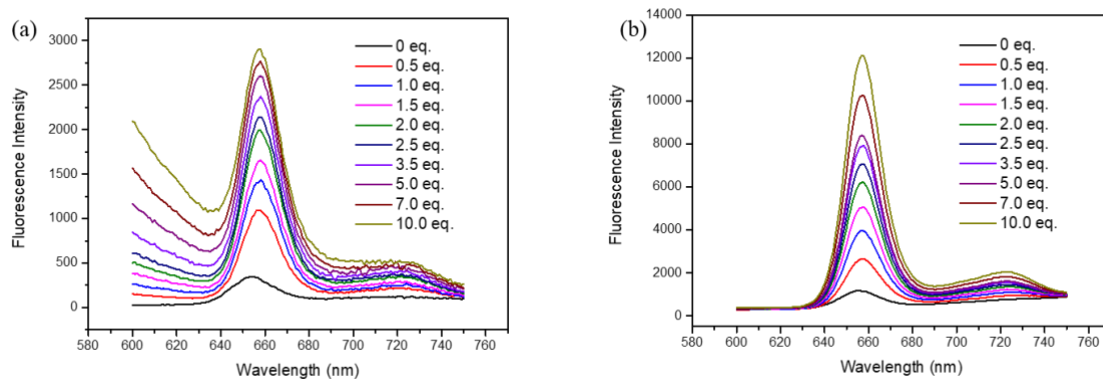

**Figure S4.** Fluorescence spectra of *m*THPC with increasing equivalent of (a) SOF 2 and (b) SOF 3 ( $\lambda_{\text{ex}} = 425 \text{ nm}$ ) in aqueous solution at 25 °C.

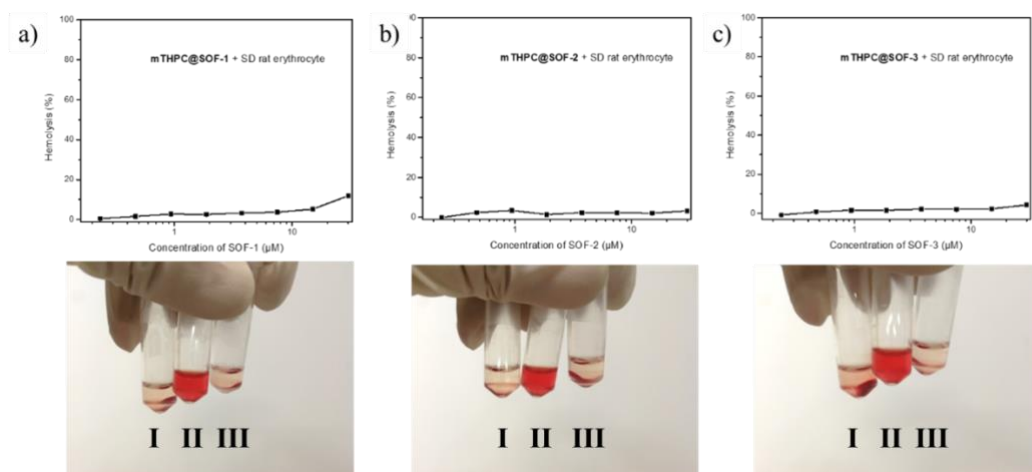

**Figure S5.** Hemolytic activity of SD rat erythrocyte treated with (a) *m*THPC-SOF 1 ( $[m\text{THPC}]:[\text{T4}] = 1:5$ ), (d) *m*THPC-SOF 2 ( $[m\text{THPC}]:[\text{T5}] = 1:5$ ) and (e) *m*THPC-SOF 3 ( $[m\text{THPC}]:[\text{T6}] = 1:5$ ) at variable concentrations. Centrifuge tube I: Experimental group ( $[\text{T6}] = 30 \mu\text{M}$ ,  $[m\text{THPC}] = 6 \mu\text{M}$ ). Centrifuge tube II: Positive group (deionized water). Centrifuge tube III: Negative group (normal saline).

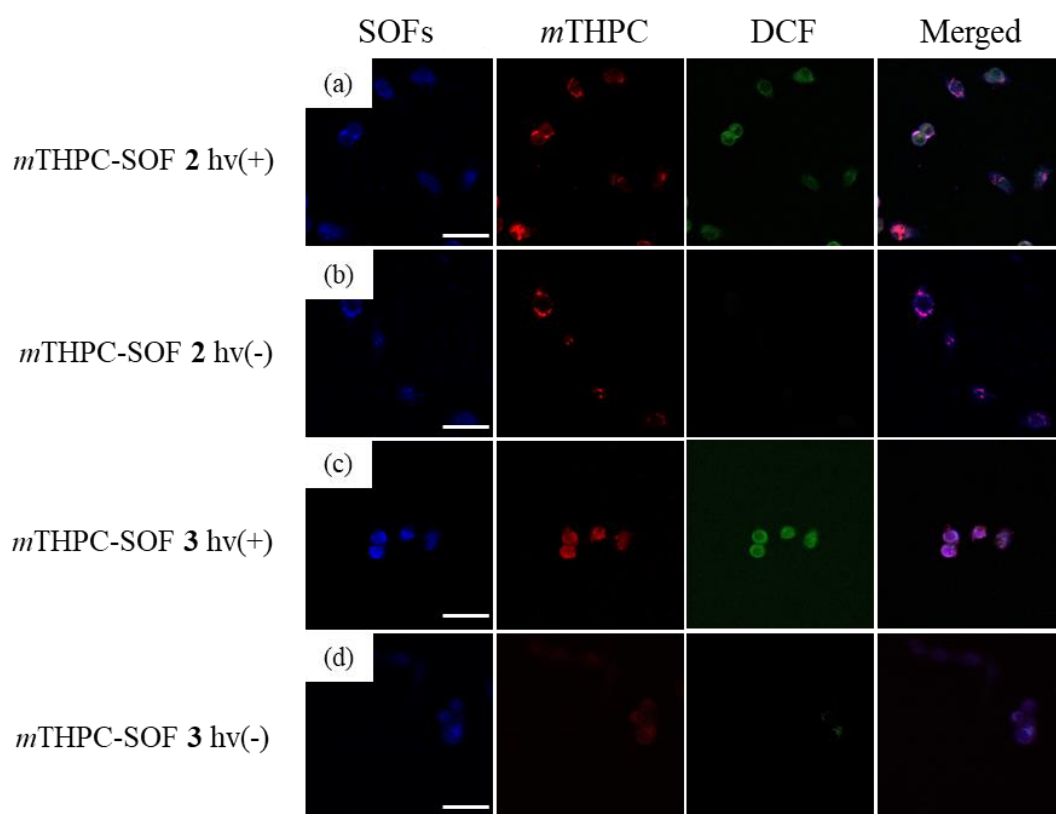

**Figure S6.** Confocal microscopic images of B16-F10 cells after treated with (a,b) *m*THPC-SOF 2 ( $[\text{T5}] = 50.0 \mu\text{M}$ ,  $[m\text{THPC}] = 10.0 \mu\text{g/mL}$ ), (c,d) *m*THPC-SOF 3 ( $[\text{T6}] = 50.0 \mu\text{M}$ ,  $[m\text{THPC}] = 10.0 \mu\text{g/mL}$ ) for 4 hours at  $37^\circ\text{C}$ . For irradiation groups, cells were applied with 650 nm laser irradiation ( $0.2 \text{ W/cm}^2$ , 1 min, 12 J). For dark groups, cells were incubated in dark. SOFs showed

blue fluorescence. *m*THPC showed red fluorescence. DCF showed green fluorescence, indicating singlet oxygen generation. Scale bar: 50  $\mu\text{m}$ .

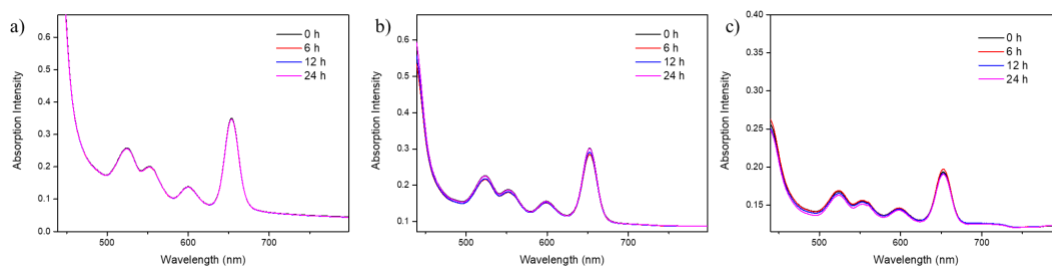

**Figure S7.** UV-Vis spectra of a) **mTHPC@SOF-1** ( $[\text{mTHPC}] = 20 \mu\text{M}$ ,  $[\text{SOF-1}] = 0.1 \text{ mM}$ ) b) **mTHPC@SOF-2** ( $[\text{mTHPC}] = 20 \mu\text{M}$ ,  $[\text{SOF-2}] = 0.1 \text{ mM}$ ) and c) **mTHPC@SOF-3** ( $[\text{mTHPC}] = 20 \mu\text{M}$ ,  $[\text{SOF-3}] = 0.1 \text{ mM}$ ) after incubated in phosphate buffered saline for 0, 6, 12 and 24 hours.

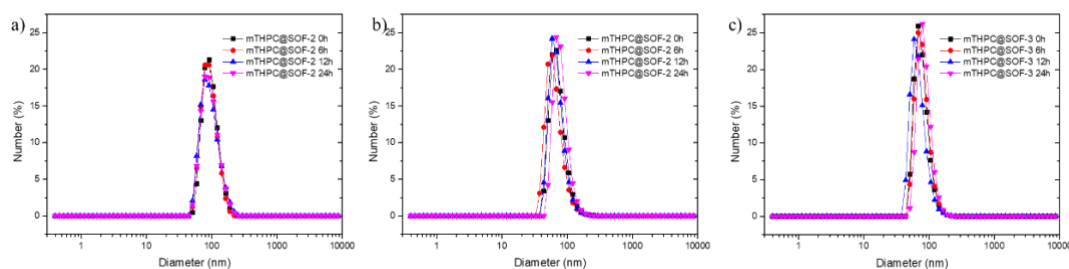

**Figure S8.** DLS profile of a) **mTHPC@SOF-1** ( $[\text{mTHPC}] = 20 \mu\text{M}$ ,  $[\text{SOF-1}] = 0.1 \text{ mM}$ ) b) **mTHPC@SOF-2** ( $[\text{mTHPC}] = 20 \mu\text{M}$ ,  $[\text{SOF-2}] = 0.1 \text{ mM}$ ) and c) **mTHPC@SOF-3** ( $[\text{mTHPC}] = 20 \mu\text{M}$ ,  $[\text{SOF-3}] = 0.1 \text{ mM}$ ) after incubated in phosphate buffered saline for 0, 6, 12 and 24 hours.

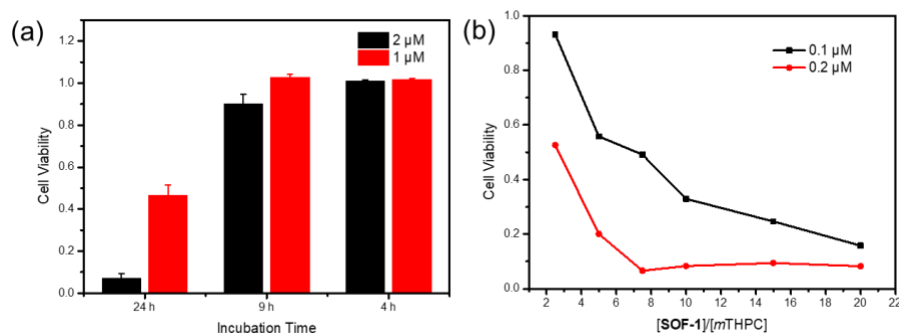

**Figure S9.** Viability after laser irradiation (650 nm, 2 min,  $0.1 \text{ W/cm}^2$ ) of (a) B16-F10 cells treated with *m*THPC-SOF 1 ( $[\text{mTHPC}]:[\text{T4}] = 1:5$ ) at concentration of 2  $\mu\text{M}$  and 1  $\mu\text{M}$  separately, with different incubation time and (b) HeLa cells treated by different ratio of SOF 1 and *m*THPC.
